# Supplementary material for: Enhancing lithium/sodium-ion storage behaviors in a V2O5 nanosheet by freeze-drying
Source: Royal Society of Chemistry journal article supplement (doi:10.1039/d2ce00320a), 2022-01-01
Supplement: d2ce00320a1.pdf [file d2ce00320a1.pdf]

## Supporting information

### Enhancing lithium/sodium-ion storage behaviors in V<sub>2</sub>O<sub>5</sub> nanosheet by freeze-drying

Lihua Wang<sup>1,#</sup>, Guanghua Shen<sup>1,#</sup>, Yanhua Zhao<sup>1</sup>, Yongli Wang<sup>1</sup>, and Yongjie Zhao<sup>2,\*</sup>

<sup>1</sup>School of Environmental and Chemical Engineering, Zhaoqing University, Zhaoqing 526061, P R China

<sup>2</sup>School of Materials Science and Engineering, Beijing Institute of Technology, Beijing 100081, PR China

\*Corresponding author: zhaoyj14@bit.edu.cn

#These authors contribute equally to this article.

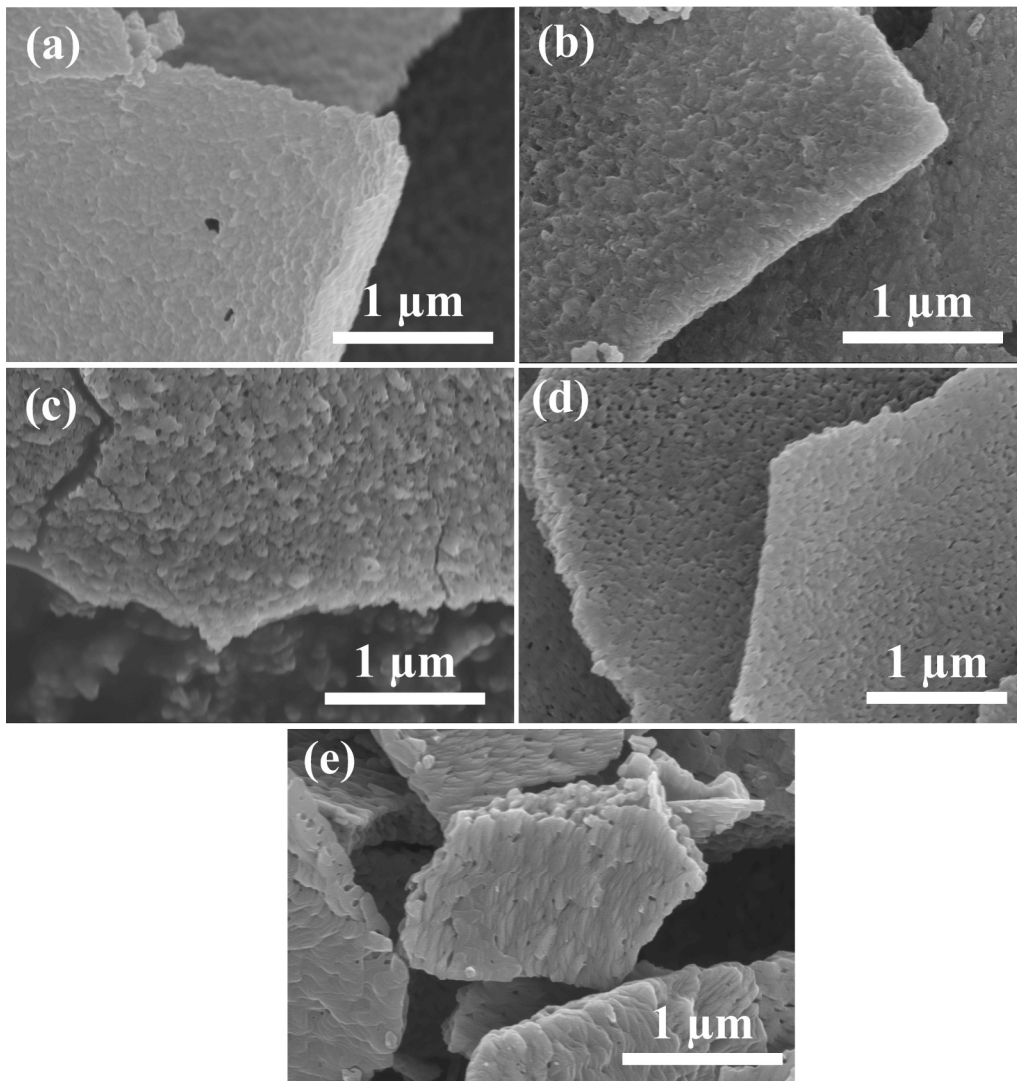

**Figure S1.** SEM images for different annealing temperature (a) freeze-drying treated  $\text{NH}_4\text{VO}_3$ , (b) 200 °C, (c) 250 °C, (d) 300 °C, (e) 350 °C.

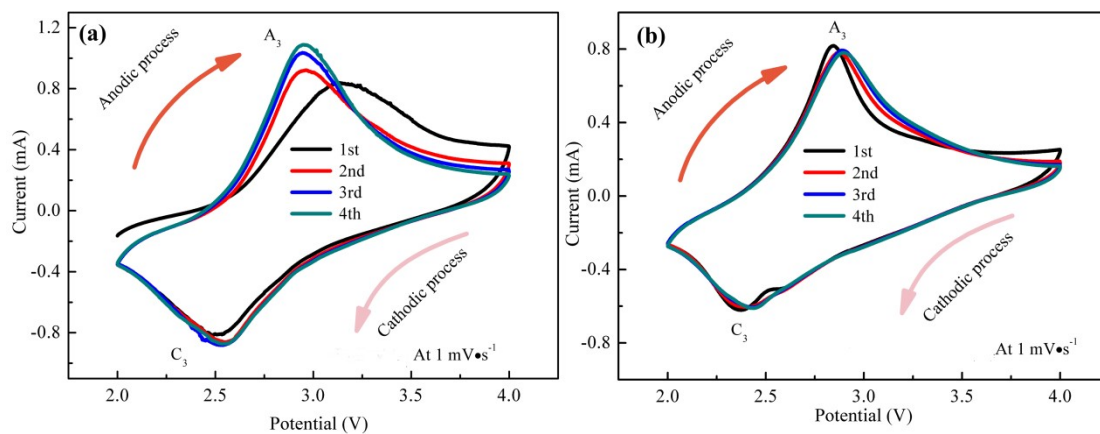

**Figure S2.** (a) CV curves of the first four cycles at a scan rate of 1 mV s<sup>-1</sup> in the voltage region of 2.0~4.0 V (vs. Li/Li<sup>+</sup>): (a) bulk V<sub>2</sub>O<sub>5</sub> and (b) V<sub>2</sub>O<sub>5</sub> nanosheet.

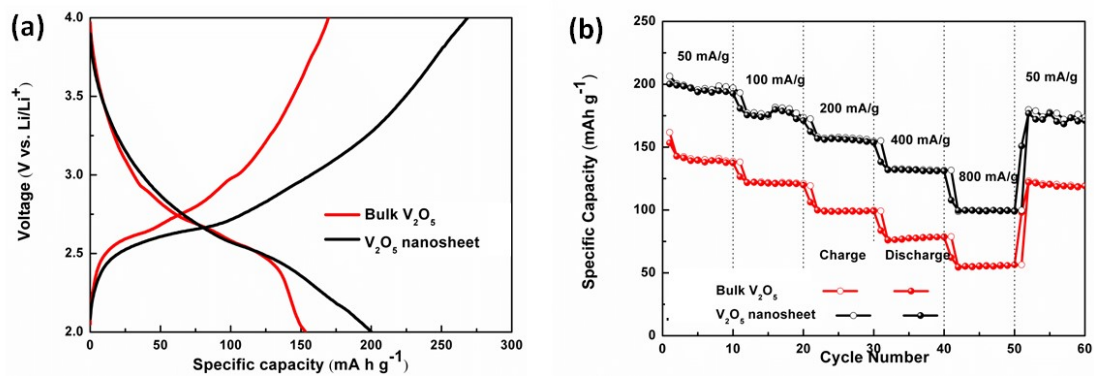

**Figure S3.** (a) Galvanostatic charge/discharge curves for the first cycle and (b) rate capability of bulk V<sub>2</sub>O<sub>5</sub> and V<sub>2</sub>O<sub>5</sub> nanosheets.

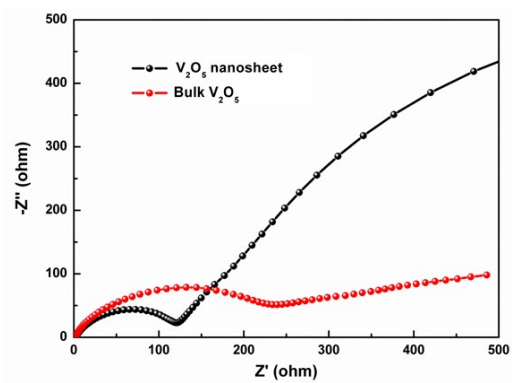

**Figure S4.** EIS plots of bulk V<sub>2</sub>O<sub>5</sub> and V<sub>2</sub>O<sub>5</sub> nanosheet electrodes vs Li/Li<sup>+</sup>,
